# Supplementary material
Source: ML conference proceedings conference paper supplement (https://openreview.net/forum?id=VtpANKeHeJ)

Caucasian

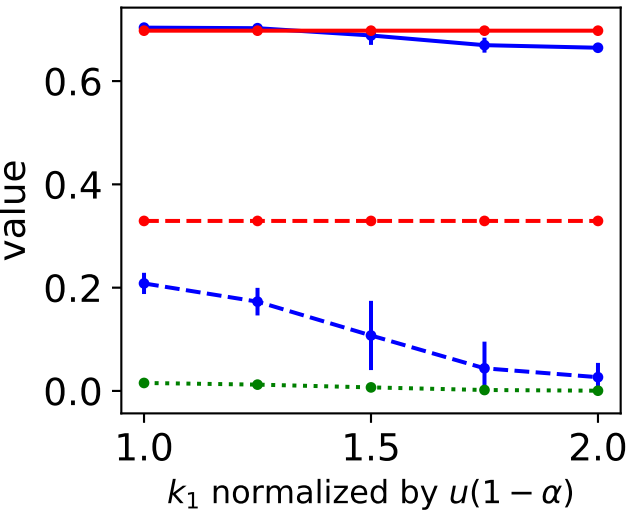

African American

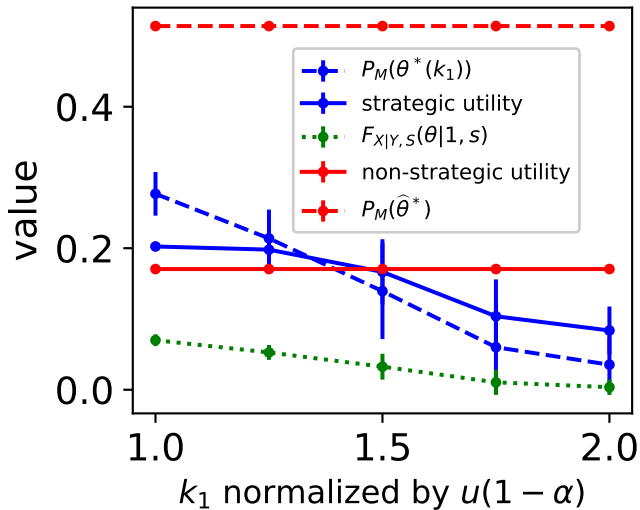

Supplement: supplementary_material [file attachment]

Caucasian

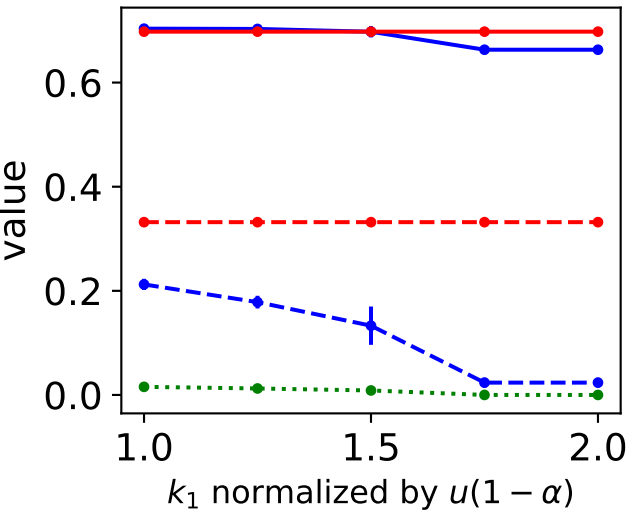

African American

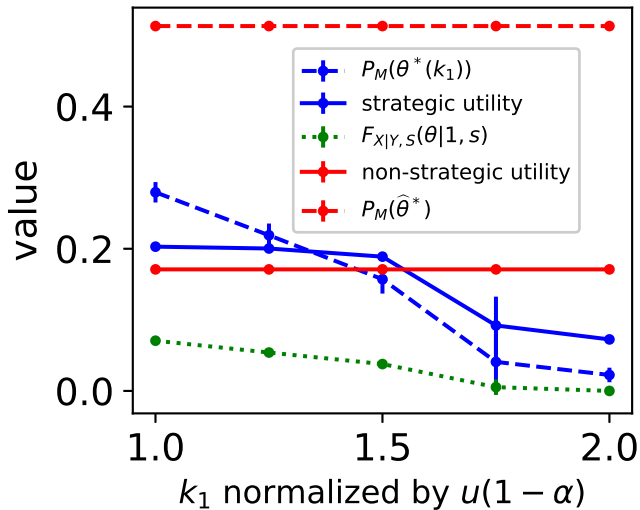

Supplement: supplementary_material [file attachment]
